# Supplementary material for: Colloidal properties of water dispersible magnetite nanoparticles by photon correlation spectroscopy
Source: Royal Society of Chemistry journal article supplement (doi:10.1039/c5ra26488j), 2016-01-01
Supplement: c5ra26488j1.pdf [file c5ra26488j1.pdf]

## Electronic Supplementary Information

### Colloidal properties of water dispersible magnetite nanoparticles by photon correlation spectroscopy.

Srividhya J. Iyengar, Mathew Joy, Titir Maity, Jnananjan Chakraborty, Ravinder K. Kotnala, and Swapankumar Ghosh\*

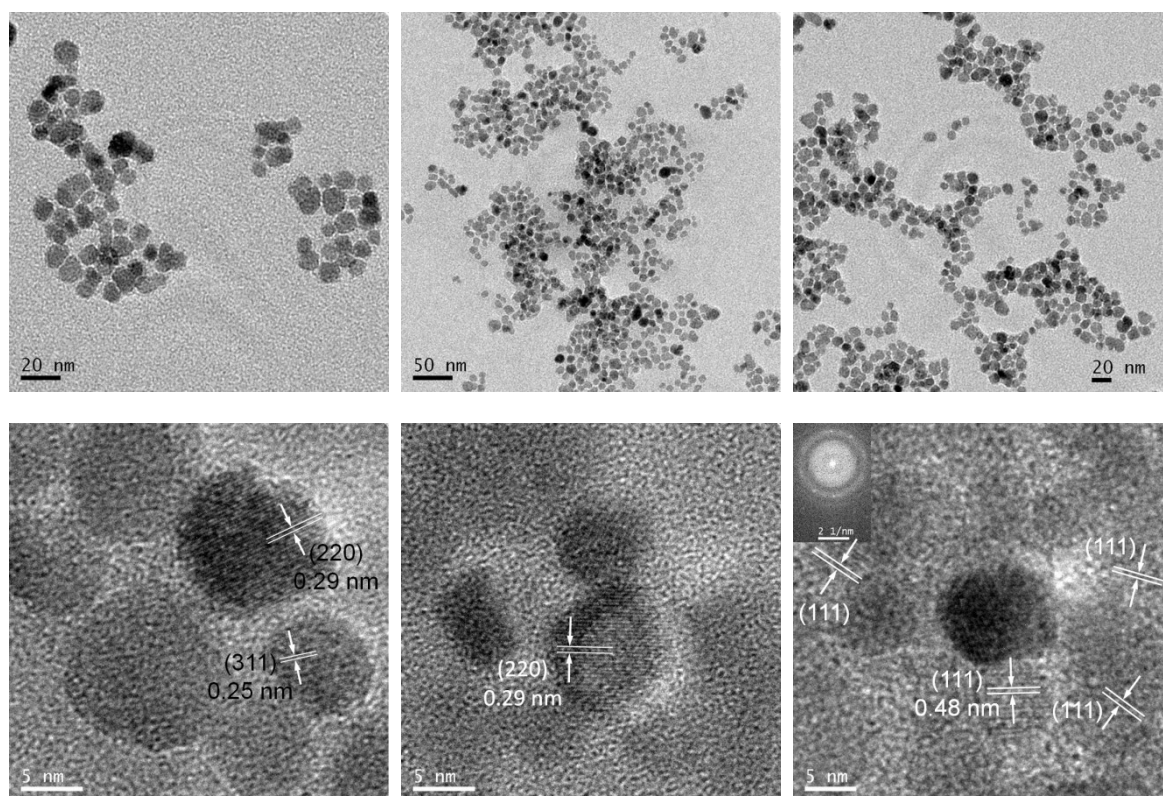

Fig. S1 Bright field as well as high resolution TEM images of TMAH coated magnetite nanocrystals.

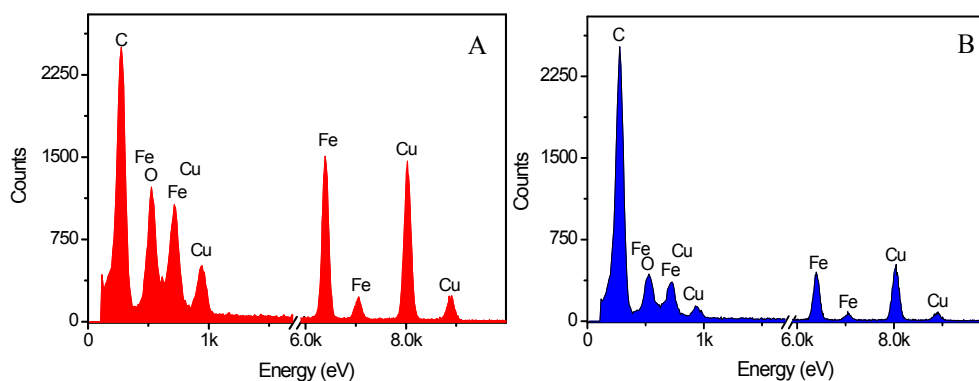

Fig. S2 Energy dispersive spectra of synthetic magnetite A) AM as well as B) coated sample TMA over the TEM grid

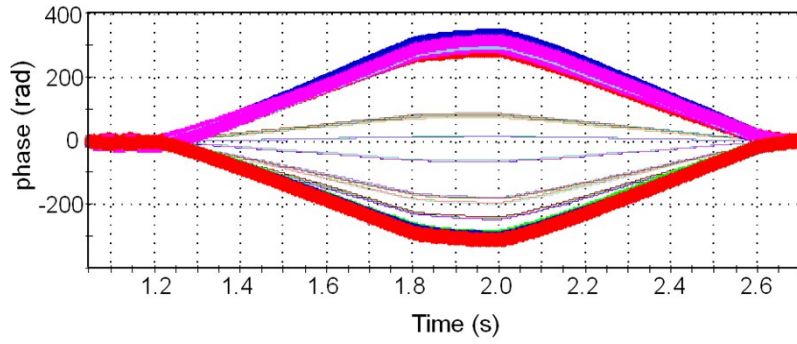

**Fig. S3** The associated phase changes from negative to positive with zeta potential of magnetite nanocrystals suspension while varying the pH of surrounding medium from 13-2.

|                                                                                                         |                                                                           |                                                                                                   |                                                                           |
|---------------------------------------------------------------------------------------------------------|---------------------------------------------------------------------------|---------------------------------------------------------------------------------------------------|---------------------------------------------------------------------------|
| Temperature (°C): 25.0<br>Count Rate (kcps): 456.1<br>Cell Description: Disposable sizing cuvette       | Duration Used (s): 60<br>Measurement Position (mm): 0.85<br>Attenuator: 6 | Temperature (°C): 25.0<br>Count Rate (kcps): 456.1<br>Cell Description: Disposable sizing cuvette | Duration Used (s): 60<br>Measurement Position (mm): 0.85<br>Attenuator: 6 |
| <b>Z-Average (d.nm): 28.28</b><br><b>Pdl: 0.228</b><br>Intercept: 0.927<br>Result quality : <b>Good</b> | <b>Size (d.nm):</b><br>Peak 1: 34.66<br>Peak 2: 3814<br>Peak 3: 0.000     | <b>% Intensity:</b><br>97.3<br>2.7<br>0.0                                                         | <b>St Dev (d.nm):</b><br>18.21<br>1145<br>0.000                           |
| <b>Z-Average (d.nm): 28.28</b><br><b>Pdl: 0.228</b><br>Intercept: 0.927<br>Result quality : <b>Good</b> | <b>Size (d.nm):</b><br>Peak 1: 12.96<br>Peak 2: 0.000<br>Peak 3: 0.000    | <b>% Number:</b><br>100.0<br>0.0<br>0.0                                                           | <b>St Dev (d.nm):</b><br>4.116<br>0.000<br>0.000                          |

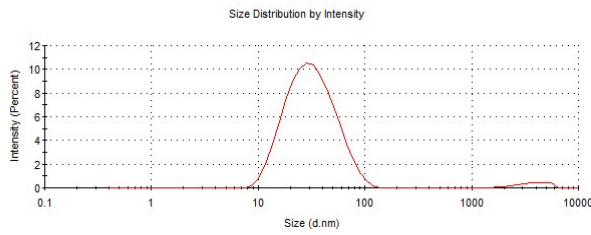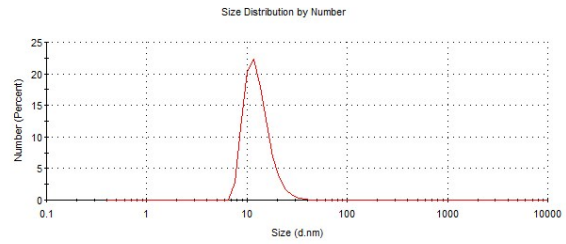

|                                                                                                         |                                                                           |                                                                                                   |                                                                           |
|---------------------------------------------------------------------------------------------------------|---------------------------------------------------------------------------|---------------------------------------------------------------------------------------------------|---------------------------------------------------------------------------|
| Temperature (°C): 35.0<br>Count Rate (kcps): 538.7<br>Cell Description: Disposable sizing cuvette       | Duration Used (s): 50<br>Measurement Position (mm): 0.85<br>Attenuator: 6 | Temperature (°C): 35.0<br>Count Rate (kcps): 538.7<br>Cell Description: Disposable sizing cuvette | Duration Used (s): 50<br>Measurement Position (mm): 0.85<br>Attenuator: 6 |
| <b>Z-Average (d.nm): 31.35</b><br><b>Pdl: 0.255</b><br>Intercept: 0.908<br>Result quality : <b>Good</b> | <b>Size (d.nm):</b><br>Peak 1: 48.61<br>Peak 2: 0.000<br>Peak 3: 0.000    | <b>% Intensity:</b><br>100.0<br>0.0<br>0.0                                                        | <b>St Dev (d.nm):</b><br>41.36<br>0.000<br>0.000                          |
| <b>Z-Average (d.nm): 31.35</b><br><b>Pdl: 0.255</b><br>Intercept: 0.908<br>Result quality : <b>Good</b> | <b>Size (d.nm):</b><br>Peak 1: 13.76<br>Peak 2: 0.000<br>Peak 3: 0.000    | <b>% Number:</b><br>100.0<br>0.0<br>0.0                                                           | <b>St Dev (d.nm):</b><br>4.009<br>0.000<br>0.000                          |

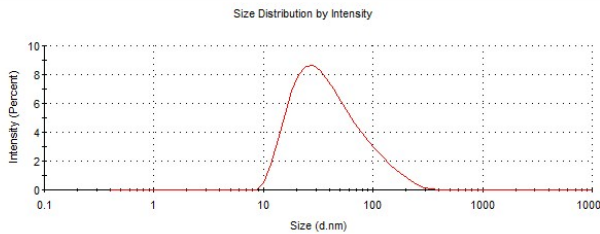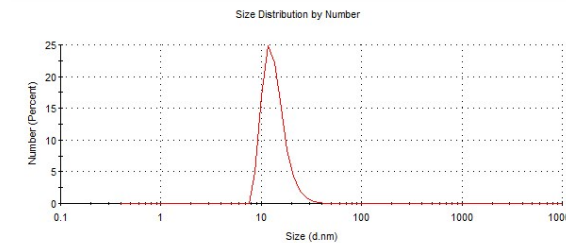

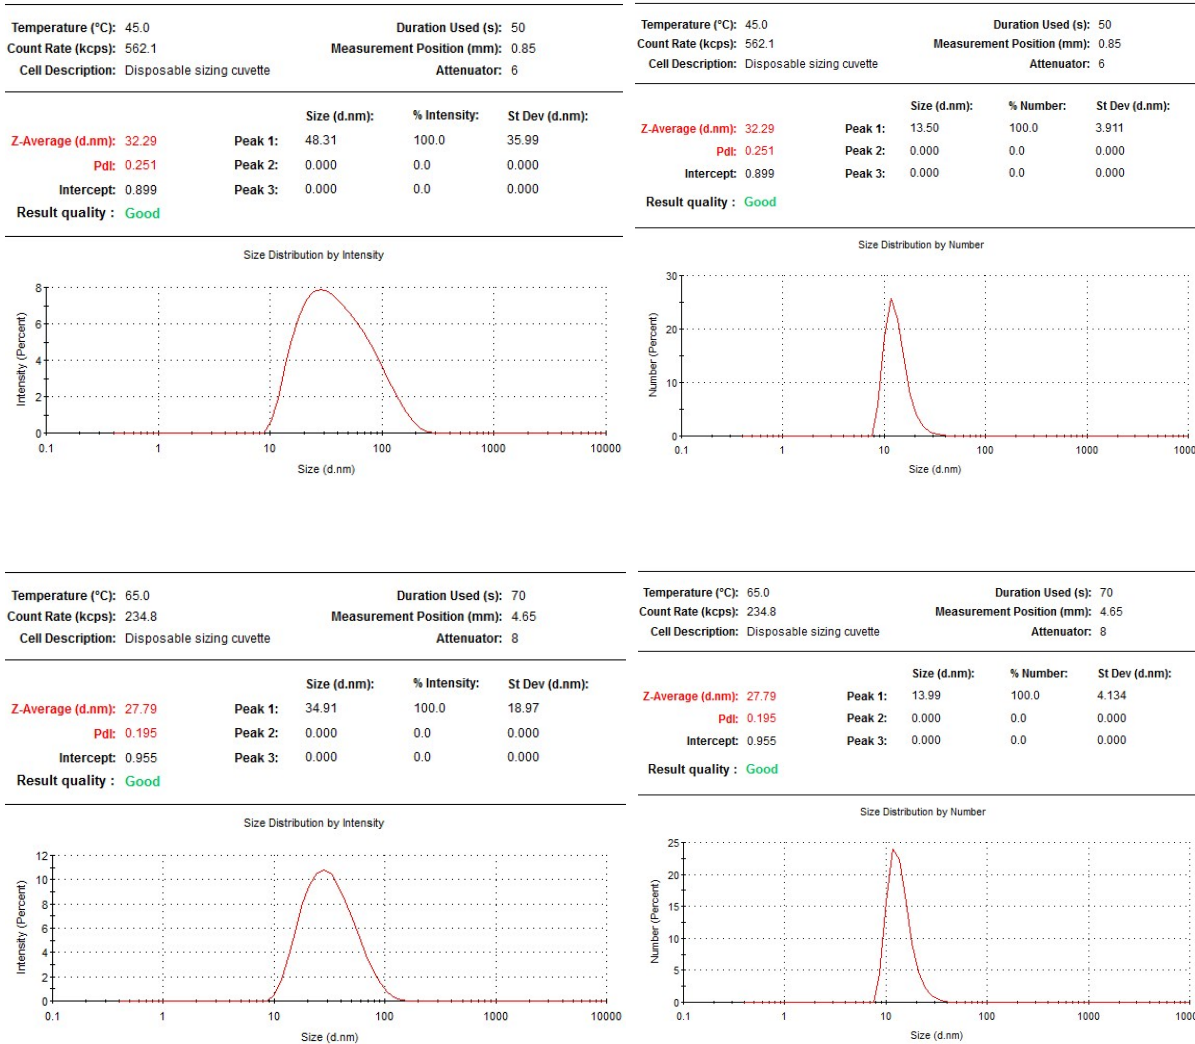

**Fig. S4** Few snap shots of aqueous magnetite suspension recored at variuos temperatures 25, 35, 45, 65 °C by photon correlation spectroscopy showed unimodal typical guassian type. Right side is the intensity (%) based size distribution and the left is the number (%) size distribution which was calculated from the corresponding intensity.

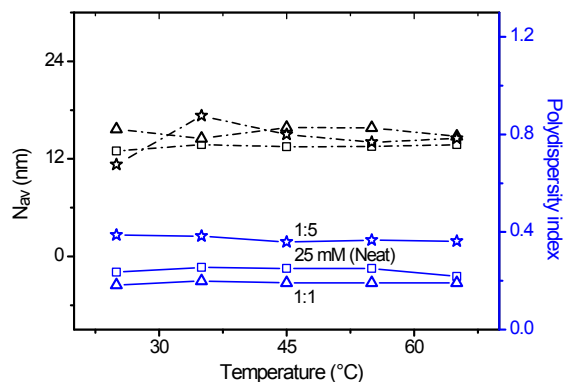

**Fig. S5** Hydrodynamic size as  $N_{av}$  and the colloidal stability as a function of temperature for MNPs suspension examined at various concentrations, the mean particle size (dotted layer) plotted against polydispersity index (solid layer) with different concentrations neat (box), 1:1 (triangle), 1:5 (star) dilutions.
